# Supplementary material
Source: publisher site journal article supplement (https://www.dovepress.com/article/277448)
Supplement: Supplementary file 1 [file get_supplementary_file.php]

## Supplementary table: ADYS questionnaire-basis for patient

### interview

|     |                                                                                                                                                                                                                                                            |
|-----|------------------------------------------------------------------------------------------------------------------------------------------------------------------------------------------------------------------------------------------------------------|
| 1.  | <b>Living in Malmö:</b> 1-Yes, 2-No, 9-Unknown                                                                                                                                                                                                             |
| 2.  | <b>If Malmö, which suburban district:</b> 1-Centrum, 2-Södra Innerstaden, 3-Västra Innerstaden, 4-Limhamn Bunkeflo, 5-Hyllie, 6-Fosie, 7-Oxie, 8-Rosengård, 9-Husie, 10-Kirseberg, 11-Unknown                                                              |
| 3.  | <b>Preliminary symptom at arrival/cause of visit:</b> 1-Dyspnea, 2-CHF, 3-CAD, 4-COPD/Asthma, 5-Pneumonia, 6-Tromboembolic disease, 7-Anxiety, 8-Other diagnosis, 9-Unknown.                                                                               |
| 4.  | <b>Manner of visit:</b> 1- Own initiative, 2-Referral from Primary health care, 3-Referral from other, 9-Unknown                                                                                                                                           |
| 5.  | <b>If referral from other, state whom:</b>                                                                                                                                                                                                                 |
| 6.  | <b>Civil status:</b> 1- married/partner, 2- partner with separate accommodation, 3-single, 9-unknown                                                                                                                                                       |
| 7.  | <b>Heredity:</b> 1-cardiovascular disease, 2-pulmonary disease, 3- rheumatic disease, 4-cancer, 5-other, 9-unknown                                                                                                                                         |
| 8.  | <b>State profession:</b>                                                                                                                                                                                                                                   |
| 9.  | <b>Home medical health care:</b> 1-yes, 2-no, 9-unknown                                                                                                                                                                                                    |
| 10. | <b>Home care:</b> 1-yes, 2-no, 9-unknown                                                                                                                                                                                                                   |
| 11. | <b>Technical aids in the home:</b> 1-yes, 2-no, 9-unknown                                                                                                                                                                                                  |
| 12. | <b>Nursing home:</b> 1-yes, 2-no, 9-unknown                                                                                                                                                                                                                |
| 13. | <b>Close relative in Scania:</b> 1-yes, 2-no, 9-unknown                                                                                                                                                                                                    |
| 14. | <b>Need for interpreter:</b> 1-yes, 2-no, 9-unknown                                                                                                                                                                                                        |
| 15. | <b>Ethnical background;</b> born in 1-Sweden, 2-Europe both not Sweden, 3-Outside of Europe                                                                                                                                                                |
| 16. | <b>Smoker:</b> 1-never smoked, 2-previous smoker, terminated >1 month, 3-smoker (party smoker) > 1month, 9-unknown                                                                                                                                         |
| 17. | <b>Passive smoker:</b> 1-yes, 2-no, 3-prior > 1 month, 9-unknown                                                                                                                                                                                           |
| 18. | <b>Amount of alcohol per week:</b> 1-none, 2-less than 4 glasses (20 cl) wine (or corresponding amount beer/liquor) per week, 3- more than 4 glasses (20 cl) wine (or corresponding amount beer/liquor) per week, 4-somatic signs of alcoholism, 9-unknown |
| 19. | <b>Drug abuse:</b> 1-yes, 2-no, 9-unknown                                                                                                                                                                                                                  |
| 20. | <b>Need for social care planning:</b> 1-yes, 2-no, 9-unknown                                                                                                                                                                                               |
| 21. | <b>Previous/ongoing coronary heart disease (CHD):</b> 1-yes, 2-no, 9-unknown                                                                                                                                                                               |
| 22. | <b>Previous/ongoing congestive heart failure (CHF):</b> 1-yes, 2-no, 9-unknown                                                                                                                                                                             |
| 23. | <b>Previous/ongoing atrial flutter/fibrillation:</b> 1-yes, 2-no, 9-unknown                                                                                                                                                                                |
| 24. | <b>Previous/ongoing Chronic Obstructive Pulmonary Disease (COPD):</b> 1-yes, 2-no, 9-unknown                                                                                                                                                               |

|     |                                                                                                                 |
|-----|-----------------------------------------------------------------------------------------------------------------|
| 25. | <b>Previous/ongoing Asthma:</b> 1-yes, 2-no, 9-unknown                                                          |
| 26. | <b>Previous/ongoing Restrictive pulmonary disease:</b> 1-yes, 2-no, 9-unknown                                   |
| 27. | <b>Previous/ongoing Other pulmonary disease:</b> 1-yes, 2-no, 9-unknown                                         |
| 28. | <b>Previous/ongoing Neuromuscular disease (post-polio syndrome included):</b> 1-yes, 2-no, 9-unknown            |
| 29. | <b>Previous/ongoing Rheumatic disease:</b> 1-yes, 2-no, 9-unknown                                               |
| 30. | <b>Previous/ongoing Pulmonary embolus/thromboembolic disease:</b> 1-yes, 2-no, 9-unknown                        |
| 31. | <b>Previous/ongoing Pneumonia or other serious infections requiring hospitalization:</b> 1-yes, 2-no, 9-unknown |
| 32. | <b>Previous/ongoing Anaemia (women Hb&lt;115g/L, men &lt;130g/L):</b> 1-yes, 2-no, 9-unknown                    |
| 33. | <b>Previous/ongoing Cancer:</b> 1-yes, 2-no, 9-unknown                                                          |
| 34. | <b>Previous/ongoing Obesity (BMI&gt;30 kg/m<sup>2</sup>):</b> 1-yes, 2-no, 9-unknown                            |
| 35. | <b>Previous/ongoing Diabetes mellitus:</b> 1-yes, 2-no, 9-unknown                                               |
| 36. | <b>Previous/ongoing Hypertension:</b> 1-yes, 2-no, 9-unknown                                                    |
| 37. | <b>Previous/ongoing Stroke or Transitory Ischemic Attack:</b> 1-yes, 2-no, 9-unknown                            |
| 38. | <b>Previous/ongoing Dementia:</b> 1-yes, 2-no, 9-unknown                                                        |
| 39. | <b>Previous/ongoing Anxiety disorder:</b> 1-yes, 2-no, 9-unknown                                                |
| 40. | <b>Previous/ongoing Depression:</b> 1-yes, 2-no, 9-unknown                                                      |
| 41. | <b>Previous/ongoing Parenchymatic Kidney Disease:</b> 1-yes, 2-no, 9-unknown                                    |
| 42. | <b>Previous/ongoing Hip Fracture:</b> 1-yes, 2-no, 9-unknown                                                    |
| 43. | <b>State previous/ongoing other disease:</b>                                                                    |
| 44. | <b>Medication with ACE inhibitor:</b> 1-yes, 2-no, 9-unknown                                                    |
| 45. | <b>Medication with anticoagulant:</b> 1-yes, 2-no, 9-unknown                                                    |
| 46. | <b>Medication with A2 inhibitor:</b> 1-yes, 2-no, 9-unknown                                                     |
| 47. | <b>Medication with antipsychotics:</b> 1-yes, 2-no, 9-unknown                                                   |
| 48. | <b>Medication with antidepressant:</b> 1-yes, 2-no, 9-unknown                                                   |
| 49. | <b>Medication with acetyl salicylic acid:</b> 1-yes, 2-no, 9-unknown                                            |
| 50. | <b>Medication with other platelet inhibitor (i.e. Clopidogrel):</b> 1-yes, 2-no, 9-unknown                      |
| 51. | <b>Medication with betablocker:</b> 1-yes, 2-no, 9-unknown                                                      |
| 52. | <b>Medication with calcium inhibitor:</b> 1-yes, 2-no, 9-unknown                                                |
| 53. | <b>Medication with insulin:</b> 1-yes, 2-no, 9-unknown                                                          |
| 54. | <b>Medication with oral diabetic medication:</b> 1-yes, 2-no, 9-unknown                                         |
| 55. | <b>Medication with digitalis:</b> 1-yes, 2-no, 9-unknown                                                        |
| 56. | <b>Medication with diuretics:</b> 1-yes, 2-no, 9-unknown                                                        |
| 57. | <b>Medication with aldosterone inhibitor:</b> 1-yes, 2-no, 9-unknown                                            |
| 58. | <b>Medication with pulmonary inhalators:</b> 1-yes, 2-no, 9-unknown                                             |

|     |                                                                                                   |
|-----|---------------------------------------------------------------------------------------------------|
| 59. | <b>Medication with corticosteroids:</b> 1-yes, 2-no, 9-unknown                                    |
| 60. | <b>Medication with levothyroxine:</b> 1-yes, 2-no, 9-unknown                                      |
| 61. | <b>Medication with long-acting nitroglycerin:</b> 1-yes, 2-no, 9-unknown                          |
| 62. | <b>Medication with anxiolytics:</b> 1-yes, 2-no, 9-unknown                                        |
| 63. | <b>Medication with analgesics:</b> 1-yes, 2-no, 9-unknown                                         |
| 64. | <b>State name of medications if other relevant medication:</b>                                    |
| 65. | <b>State total number of drugs:</b>                                                               |
| 66. | <b>How/in what way is the medication administered:</b> 1- self, 2-<br>relative,3-other, 4-unknown |
| 67. | <b>If other, state whom (e.g. district nurse):</b>                                                |

## Supplementary table: ADYS registered variables

|     |                                                                                                                                                                          |
|-----|--------------------------------------------------------------------------------------------------------------------------------------------------------------------------|
| 1.  | <b>Visit date (yyyy-mm-dd):</b>                                                                                                                                          |
| 2.  | <b>Social security number:</b>                                                                                                                                           |
| 3.  | <b>Birth date (yyyy-mm-dd):</b>                                                                                                                                          |
| 4.  | <b>Gender:</b> 1-Male, 2-Female                                                                                                                                          |
| 5.  | <b>Arrival by ambulance:</b> 1-yes, 2-no, 9-unkown                                                                                                                       |
| 6.  | <b>Ambulance alarm:</b> 1-yes, 2-no, 9-unkown                                                                                                                            |
| 7.  | <b>METTS priority:</b> 1-red, 2-orange, 3-yellow, 4-green, 9-unknown                                                                                                     |
| 8.  | <b>If previous CHF, was echo ever performed:</b> 1-yes, 2-no, 9-unkown                                                                                                   |
| 9.  | <b>If previous echo, what was the result of EF:</b> 1-normal (>50%), 2-slightly impaired (40-49%), 3-moderately impaired (30-39%), 4-severely impaired (<30%), 9-unknown |
| 10. | <b>If previous echo, sign of diastolic dysfunction:</b> 1-yes, 2-no, 9-unkown                                                                                            |
| 11. | <b>Height (m):</b>                                                                                                                                                       |
| 12. | <b>Weight (kg):</b>                                                                                                                                                      |
| 13. | <b>Body Mass Index (kg/m<sup>2</sup>):</b>                                                                                                                               |
| 14. | <b>Systolic blood pressure (mmHg):</b>                                                                                                                                   |
| 15. | <b>Diastolic blood pressure (mmHg):</b>                                                                                                                                  |
| 16. | <b>Heart rate (bpm):</b>                                                                                                                                                 |
| 17. | <b>Pulse oximetry (%):</b>                                                                                                                                               |
| 18. | <b>If oxygen treatment, state how many liters:</b>                                                                                                                       |
| 19. | <b>Respiratory rate (per minute):</b>                                                                                                                                    |
| 20. | <b>Body temperature (C°):</b>                                                                                                                                            |
| 21. | <b>Pulmonary auscultation:</b> 1-normal, 2-abnormal                                                                                                                      |
| 22. | <b>Level of shortness of breath/dyspnea:</b> 1-unaffected, 2-mild shortness of breath, 3-shortness of breath on exertion, 4-shortness of breath at rest                  |
| 23. | <b>ECG taken at the ED:</b> 1-yes, 2-no, 9-unkown                                                                                                                        |
| 24. | <b>ECG rhythm:</b> 1-sinus rhythm, 2-atrial fibrillation/flutter, 3-other, 9-unknown                                                                                     |
| 25. | <b>ECG QRS:</b> 1-normal, 2-pacemaker, 3-left bundle branch block, 4-Q-wave, 5- right bundle branch block, 6-other, 9-unknown                                            |
| 26. | <b>ECG STT:</b> 1-normal, 2-ST-elevation, 3-ST-depression, 4-pathological T-wave, 5-other, 9-unknown                                                                     |
| 27. | <b>Medication at ED newly introduced and/or temporary treatment; diuretics:</b> 1-yes, 2-no, 9-unkown                                                                    |
| 28. | <b>Medication at ED newly introduced and/or temporary treatment; digitalis:</b> 1-yes, 2-no, 9-unkown                                                                    |
| 29. | <b>Medication at ED newly introduced and/or temporary treatment; nitrates:</b> 1-yes, 2-no, 9-unkown                                                                     |

|     |                                                                                                                                                                                                                                            |
|-----|--------------------------------------------------------------------------------------------------------------------------------------------------------------------------------------------------------------------------------------------|
| 30. | <b>Medication at ED</b> newly introduced and/or temporary treatment;<br><b>oxygen:</b> 1-yes, 2-no, 9-unkown                                                                                                                               |
| 31. | <b>Medication at ED</b> newly introduced and/or temporary treatment;<br><b>continuous positive airway pressure:</b> 1-yes, 2-no, 9-unkown                                                                                                  |
| 32. | <b>Medication at ED</b> newly introduced and/or temporary treatment;<br><b>bronchodilator inhalations:</b> 1-yes, 2-no, 9-unkown                                                                                                           |
| 33. | <b>Medication at ED</b> newly introduced and/or temporary treatment;<br><b>corticosteroids:</b> 1-yes, 2-no, 9-unkown                                                                                                                      |
| 34. | <b>Medication at ED</b> newly introduced and/or temporary treatment;<br><b>theophylline:</b> 1-yes, 2-no, 9-unkown                                                                                                                         |
| 35. | <b>Medication at ED</b> newly introduced and/or temporary treatment;<br><b>beta-2-stimulant injection:</b> 1-yes, 2-no, 9-unkown                                                                                                           |
| 36. | <b>Medication at ED</b> newly introduced and/or temporary treatment;<br><b>blood transfusion:</b> 1-yes, 2-no, 9-unkown                                                                                                                    |
| 37. | <b>Medication at ED</b> newly introduced and/or temporary treatment;<br><b>antibiotics:</b> 1-yes, 2-no, 9-unkown                                                                                                                          |
| 38. | <b>Medication at ED</b> newly introduced and/or temporary treatment;<br><b>if other</b> relevant medication state which:                                                                                                                   |
| 39. | <b>Examination at the ED</b> performed; <b>X-ray:</b> 1-yes, 2-no, 9-unkown                                                                                                                                                                |
| 40. | Examination at the ED performed; <b>if chest x-ray state the result:</b> 1-normal, 2-congestion, 3-pleural effusion, 4-parenchymal infiltration (incl. suspect TB & malignancy)5- pneumothorax, 6-other, 9-unkown                          |
| 41. | <b>Examination at the ED</b> performed; <b>echo:</b> 1-yes, 2-no, 9-unkown                                                                                                                                                                 |
| 42. | Examination at the ED performed; <b>if echo state the result of EF :</b> 1-normal (>50%), 2-slightly impaired (40-49%), 3-moderately impaired (30-39%), 4-severely impaired (<30%), 9-unkown                                               |
| 43. | Examination at the ED performed; <b>if echo, was the pressure in the pulmonary arteries elevated:</b> 1-yes, 2-no, 9-unkown                                                                                                                |
| 44. | Examination at the ED performed; <b>if echo, signs of diastolic dysfunction:</b> 1-yes, 2-no, 9-unkown                                                                                                                                     |
| 45. | <b>Examination at the ED</b> performed; <b>computer scan of thorax:</b> 1-yes, 2-no, 9-unkown                                                                                                                                              |
| 46. | Examination at the ED performed; <b>if computer scan of thorax, state the main result:</b> 1-normal, 2-congestion, 3-pleural effusion, 4-malignancy, 5-pneumonia, 6-pulmonary embolus, 7-pneumothorax, 8-other pulmonary disease, 9-unkown |
| 47. | <b>Examination at the ED</b> performed; <b>pulmonary scintigraphy:</b> 1-yes, 2-no, 9-unkown                                                                                                                                               |
| 48. | Examination at the ED performed; <b>if pulmonary scintigraphy, state the result:</b> 1- probable pulmonary embolism, 2-other diagnose (incl. pulmonary embolism cannot be ruled out), 9-unkown                                             |
| 49. | <b>Examination at the ED</b> performed; <b>stress test of the heart:</b> 1-yes, 2-no, 9-unkown                                                                                                                                             |

|     |                                                                                                                                                                                                                            |
|-----|----------------------------------------------------------------------------------------------------------------------------------------------------------------------------------------------------------------------------|
| 50. | Examination at the ED performed; <b>if stress test of the heart, which:</b> 1- exertion test, 2- myocardial scintigraphy, 3-stress echocardiography                                                                        |
| 51. | Examination at the ED performed; <b>if stress test of the heart, state the result:</b> 1-normal, 2-pathological, 3-not assessable, 9-unknown                                                                               |
| 52. | <b>Examination at the ED performed; x-ray/angiography of coronaries:</b> 1-yes, 2-no, 9-unkown                                                                                                                             |
| 53. | Examination at the ED performed; <b>if other relevant examinations</b> state what:                                                                                                                                         |
| 54. | <b>CRP</b> (mg/L):                                                                                                                                                                                                         |
| 55. | <b>Haemoglobin</b> count (g/L):                                                                                                                                                                                            |
| 56. | <b>White blood cells</b> (leukocytes) count (x10 <sup>9</sup> /L):                                                                                                                                                         |
| 57. | <b>Sodium</b> (mmol/L)                                                                                                                                                                                                     |
| 58. | <b>Potassium</b> (mmol/L)                                                                                                                                                                                                  |
| 59. | <b>Creatinine</b> (umol/L)                                                                                                                                                                                                 |
| 60. | <b>Ionized calcium</b> (mmol/L)                                                                                                                                                                                            |
| 61. | <b>Troponin T</b> (ng/L)                                                                                                                                                                                                   |
| 62. | <b>Glucose</b> (mmol/l)                                                                                                                                                                                                    |
| 63. | <b>Venous pH</b>                                                                                                                                                                                                           |
| 64. | <b>Venous pCO<sup>2</sup></b> (kPa)                                                                                                                                                                                        |
| 65. | <b>Venous base excess</b> (mmol/l)                                                                                                                                                                                         |
| 66. | <b>Lactate</b> (mmol/L)                                                                                                                                                                                                    |
| 67. | <b>Total carbon dioxide</b> (mmol/l)                                                                                                                                                                                       |
| 68. | <b>Is arterial blood gas taken:</b> 1-yes, 2-no, 9-unkown                                                                                                                                                                  |
| 69. | <b>Biobank blood samples taken:</b> 1-yes, 2-no, 9-unkown                                                                                                                                                                  |
| 70. | <b>Biobank DNA test taken:</b> 1-yes, 2-no, 9-unkown                                                                                                                                                                       |
| 71. | <b>Admitted to hospital in ward:</b> 1-yes, 2-no, 9-unkown                                                                                                                                                                 |
| 72. | If admitted to ward, <b>what type:</b> 1-internal medicine ward, 2-intensive care unit, 3-emergency ward, 4-cardiology ward, 5-pulmonary ward, 6- infection ward, 7-other ward, 9-unknown                                  |
| 73. | <b>If other ward, state which:</b>                                                                                                                                                                                         |
| 74. | <b>If discharged from hospital, to where:</b> 1-independent living, 2- temporary other accommodation, 3-permanent other accommodation, 4- another healthcare clinic, 5-other, 9-unknown                                    |
| 75. | <b>Deceased during ED stay:</b> 1-yes, 2-no, 9-unkown                                                                                                                                                                      |
| 76. | <b>First diagnose at discharge from ED:</b> 1-CHF, 2-acute coronary syndrome, 3-COPD/asthma, 4-pneumonia/other serious infection, 5- thromboembolic disease, 6-malignancy, 7-anxiety disorder, 8-other disease, 9-unknown  |
| 77. | <b>If other first diagnose, state which:</b>                                                                                                                                                                               |
| 78. | <b>Second diagnose at discharge from ED:</b> 1-CHF, 2-acute coronary syndrome, 3-COPD/asthma, 4-pneumonia/other serious infection, 5- thromboembolic disease, 6-malignancy, 7-anxiety disorder, 8-other disease, 9-unknown |

|     |                                                                                                                                                                                                                                      |
|-----|--------------------------------------------------------------------------------------------------------------------------------------------------------------------------------------------------------------------------------------|
| 79. | <b>If other second diagnose, state which:</b>                                                                                                                                                                                        |
| 80. | <b>Third diagnose at discharge from ED:</b> 1-CHF, 2-acute coronary syndrome, 3-COPD/asthma, 4-pneumonia/other serious infection, 5-thromboembolic disease, 6-malignancy, 7-anxiety disorder, 8-other disease, 9-unknown             |
| 81. | <b>If other third diagnose, state which:</b>                                                                                                                                                                                         |
| 82. | Fourth diagnose at discharge from ED: 1-CHF, 2-acute coronary syndrome, 3-COPD/asthma, 4-pneumonia/other serious infection, 5-thromboembolic disease, 6-malignancy, 7-anxiety disorder, 8-other disease, 9-unknown                   |
| 83. | <b>If other fourth diagnose, state which:</b>                                                                                                                                                                                        |
| 84. | <b>If other relevant diagnose at discharge from ED, state which?</b>                                                                                                                                                                 |
| 85. | <b>Deceased during care in the hospital ward:</b> 1-yes, 2-no, 9-unkown                                                                                                                                                              |
| 86. | <b>First diagnose at discharge from hospital ward:</b> 1-CHF, 2-acute coronary syndrome, 3-COPD/asthma, 4-pneumonia/other serious infection, 5-thromboembolic disease, 6-malignancy, 7-anxiety disorder, 8-other disease, 9-unknown  |
| 87. | <b>If other first diagnose, state which:</b>                                                                                                                                                                                         |
| 88. | <b>Second diagnose at discharge from hospital ward:</b> 1-CHF, 2-acute coronary syndrome, 3-COPD/asthma, 4-pneumonia/other serious infection, 5-thromboembolic disease, 6-malignancy, 7-anxiety disorder, 8-other disease, 9-unknown |
| 89. | <b>If other second diagnose, state which:</b>                                                                                                                                                                                        |
| 90. | <b>Third diagnose at discharge from hospital ward:</b> 1-CHF, 2-acute coronary syndrome, 3-COPD/asthma, 4-pneumonia/other serious infection, 5-thromboembolic disease, 6-malignancy, 7-anxiety disorder, 8-other disease, 9-unknown  |
| 91. | <b>If other third diagnose, state which:</b>                                                                                                                                                                                         |
| 92. | <b>If other relevant diagnose at discharge from hospital ward, state which:</b>                                                                                                                                                      |

EF=ejection fraction; echo=echocardiogram; ECG=electrocardiogram; ED=emergency department; bpm=beats per minute; CHF=congestive heart failure;
